# Supplementary material for: Regulation of ROCK1 via Notch1 during breast cancer cell migration into dense matrices
Source: PubMed Central journal article supplement (PMC3520698; doi:10.1186/1471-2121-13-12), 2012-05-14
Supplement: 1471-2121-13-12-S4.pdf [file 1471-2121-13-12-S4.pdf]

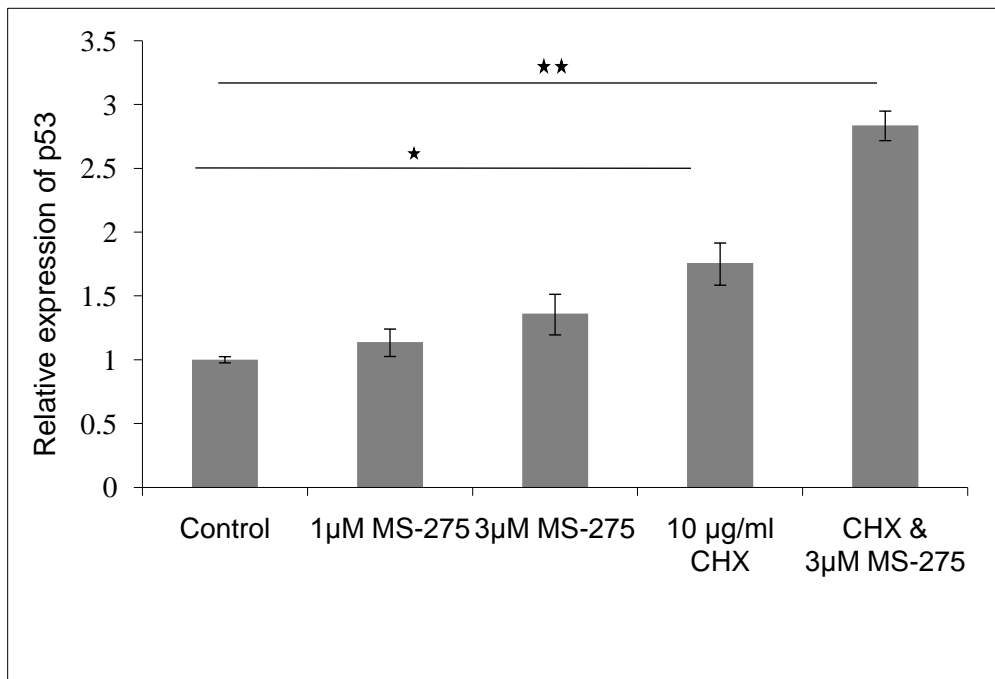

Supplementary Figure 3
